# Supplementary material for: Asthma and the risk of lung cancer: a meta-analysis
Source: PubMed Central journal article supplement (PMC5355290; doi:10.18632/oncotarget.14595), 2017-01-11
Supplement: oncotarget-08-11614-s001.pdf [file oncotarget-08-11614-s001.pdf]

## Asthma and the risk of lung cancer: a meta-analysis

### Supplementary Materials

#### SUPPLEMENTARY METHODS

##### Search Strategy

1. exp Asthma/
2. asthma\$.mp.
3. Respiratory Sounds/
4. wheez\$.mp.
5. Bronchial Spasm/
6. bronchospas\$.mp.
7. (bronch\$ adj3 spasm\$).mp.
8. bronchoconstrict\$.mp.
9. exp Bronchoconstriction/
10. (bronch\$ adj3 constrict\$).mp.
11. Bronchial Hyperreactivity/
12. Respiratory Hypersensitivity/
13. or/1-12
14. exp Lung Neoplasms/
15. (lung\$ adj3 canc\$).mp.
16. (lung\$ adj3 carcinoma\$).mp.
17. (lung\$ adj3 tumo?r\$).mp.
18. (lung\$ adj3 neoplasm\$).mp.
19. or/14-18
20. 13 and 19
